# Supplementary material
Source: publisher site journal article supplement (https://www.dovepress.com/article/539267)
Supplement: Supplementary file 1 [file 539267%20Revised%20Supplemental%20material.docx]

**Supplementary Materials Table 1. Clinical Breakpoint for Antimicrobial Susceptibility Testing**

| Antibacterial agent | Interpretive Categories and Breakpoints | | |
| --- | --- | --- | --- |
|  | S | I | R |
| Ceftriaxone | ≤8μg/ml | 16-32μg/ml | ≥64μg/ml |
| Cefepime | ≤8μg/ml | 16μg/ml | 32μg/ml |
| Imipenem | ≤2μg/ml | 4μg/ml | ≥8μg/ml |
| Gentamicin | ≤4μg/ml | 8μg/ml | ≥16μg/ml |
| Tobramycin | ≤4μg/ml | 8μg/ml | ≥16μg/ml |
| Ciprofloxacin | ≤1μg/ml | 2μg/ml | ≥4μg/ml |
| Levofloxacin | ≤2μg/ml | 4μg/ml | ≥8μg/ml |
| Tigecycline | ≤2μg/ml | 4μg/ml | ≥8μg/ml |
| Minocycline | ≥16mm | 13-15mm | ≤12mm |
| Amikacin | ≥17mm | 15-16mm | ≤14mm |
| Ceftazidime | ≥18mm | 15-17mm | ≤14mm |

S, susceptible; I, intermediate; R, resistant. Antimicrobial susceptibility interpretations followed breakpoints defined by the CLSI M100 ED33, except for tigecycline, whose MIC values were interpreted according to FDA criteria.
